# Supplementary material for: Fluorescent binary ensemble with pattern recognition ability for identifying multiple metalloproteins with applications in serum and urine
Source: Royal Society of Chemistry journal article supplement (doi:10.1039/c7ra09741g), 2017-01-01
Supplement: c7ra09741g1.pdf [file c7ra09741g1.pdf]

*Electronic Supplementary Information (ESI)*

**Fluorescent Binary Ensemble with Pattern Recognition  
Ability for Identifying Multiple Metalloproteins and  
Applications in Serum and Urine**

Demin Zheng,<sup>a</sup> Junmei Fan,<sup>a</sup> Xinyan Huang,<sup>b</sup> Liping Ding,<sup>a,\*</sup> Yunhong Xin,<sup>b</sup>

<sup>a</sup> *Key Laboratory of Applied Surface and Colloid Chemistry of Ministry of Education, School of Chemistry and Chemical Engineering, Shaanxi Normal University, Xi'an 710062, PR China*

<sup>b</sup> *College of Physics and Information Technology, Shaanxi Normal University, Xi'an 710062, PR China*

\*Corresponding author: E-mail: dinglp33@snnu.edu.cn

**Content:**

|                                                                                                             |     |
|-------------------------------------------------------------------------------------------------------------|-----|
| 1. UV-vis absorption spectra of <b>1</b> in methanol at different concentration.....                        | S1  |
| 2. The cross-reactive responses of <b>1</b> /SDBS to different metalloproteins.....                         | S2  |
| 3. TEM images of sensing ensembles.....                                                                     | S3  |
| 4. Time-resolved fluorescence decays of <b>1</b> /SDBS upon titration of metalloproteins..                  | S4  |
| 5. Fluorescence emission spectra of <b>1</b> /SDBS and the absorbance and emission spectra of pyronine..... | S5  |
| 6. Optical spectra of <b>1</b> in 1% human serum .....                                                      | S6  |
| 7. Recognition patterns and PCA plots in 5.0% human serum.....                                              | S7  |
| 8. Optical spectra of <b>1</b> in 10% human urine .....                                                     | S8  |
| 9. The <sup>1</sup> H NMR spectrum of compound <b>1</b> .....                                               | S9  |
| 10. The <sup>13</sup> C NMR spectrum of compound <b>1</b> .....                                             | S10 |
| 11. The MS of compound <b>1</b><br>.....                                                                    | S11 |

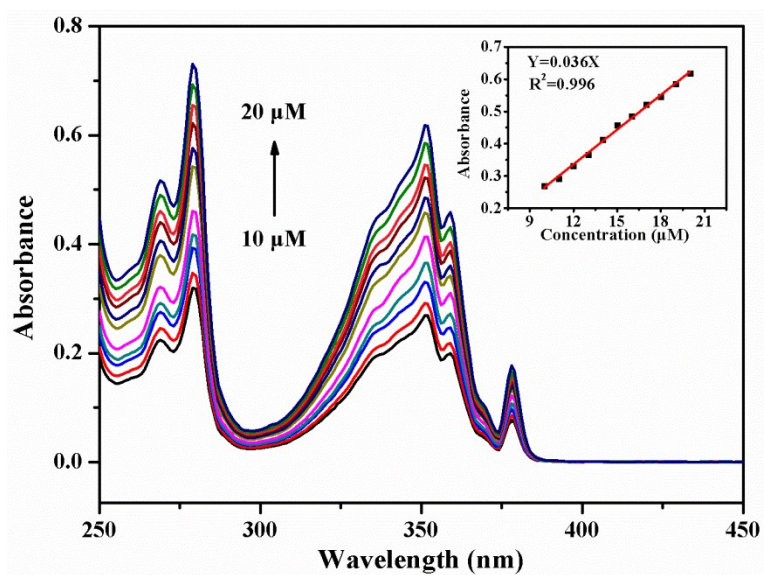

**Fig. S1** UV-vis absorption spectra of **1** in methanol at different concentration.

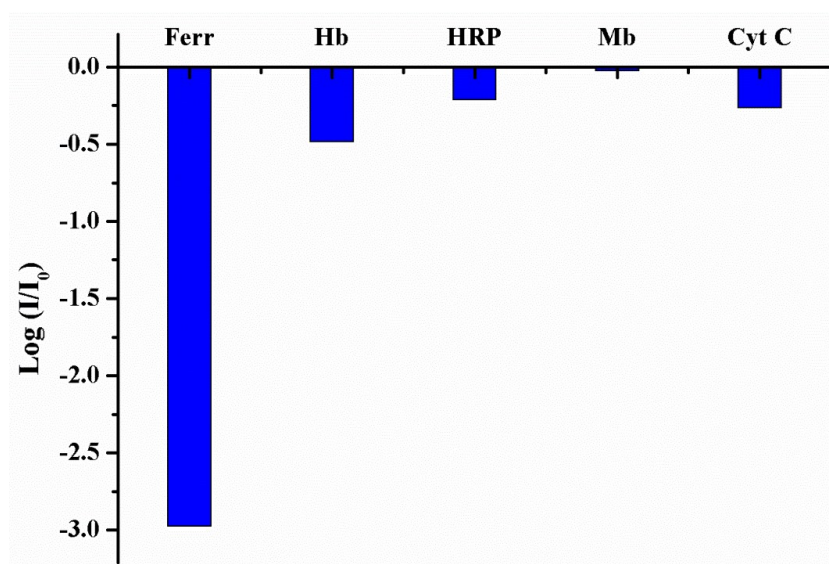

**Fig. S2** The relative fluorescent intensity at 381 nm of **1**/SDBS (5 μM/0.2 mM) in the presence of different metalloprotein (5 μM).

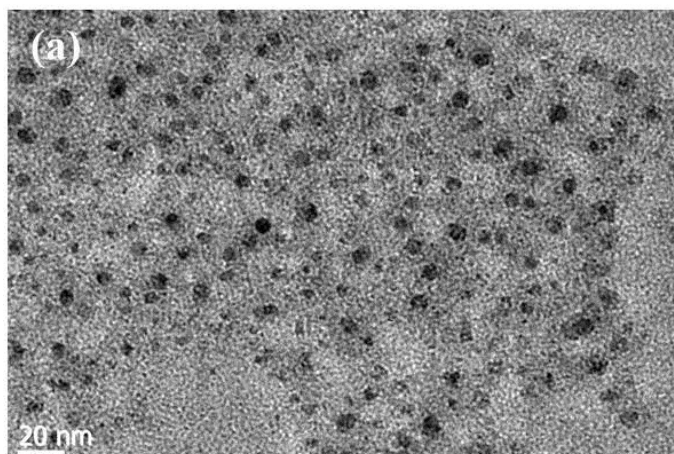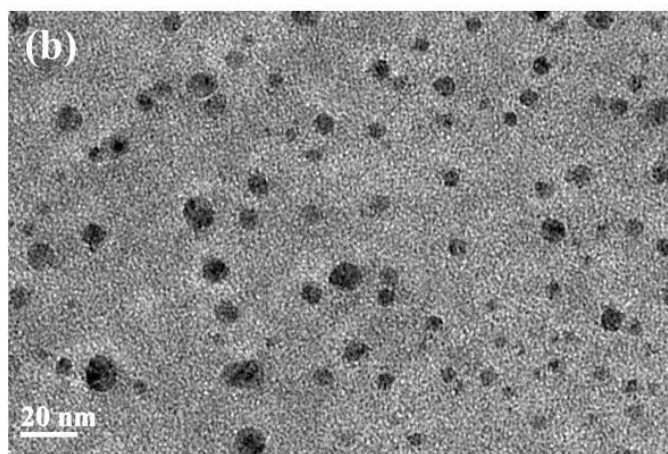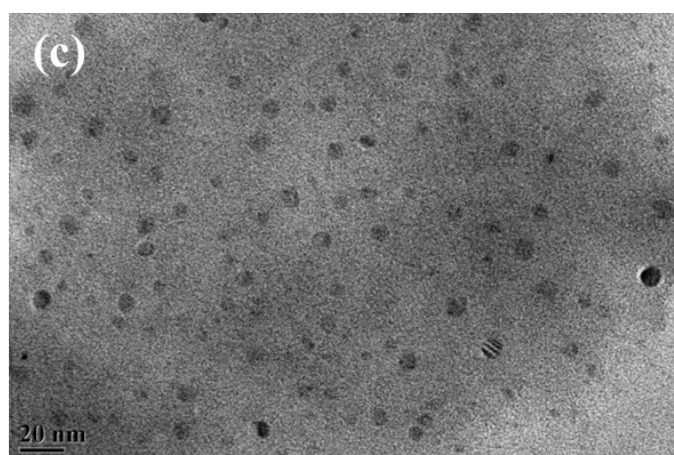

**Fig. S3** TEM images of (a) **1**/SDBS (5  $\mu$ M/0.2 mM), (b) **1**/SDBS/TRF (5  $\mu$ M/0.2 mM/10  $\mu$ M), and (c) **1**/SDBS (5  $\mu$ M/1 mM).

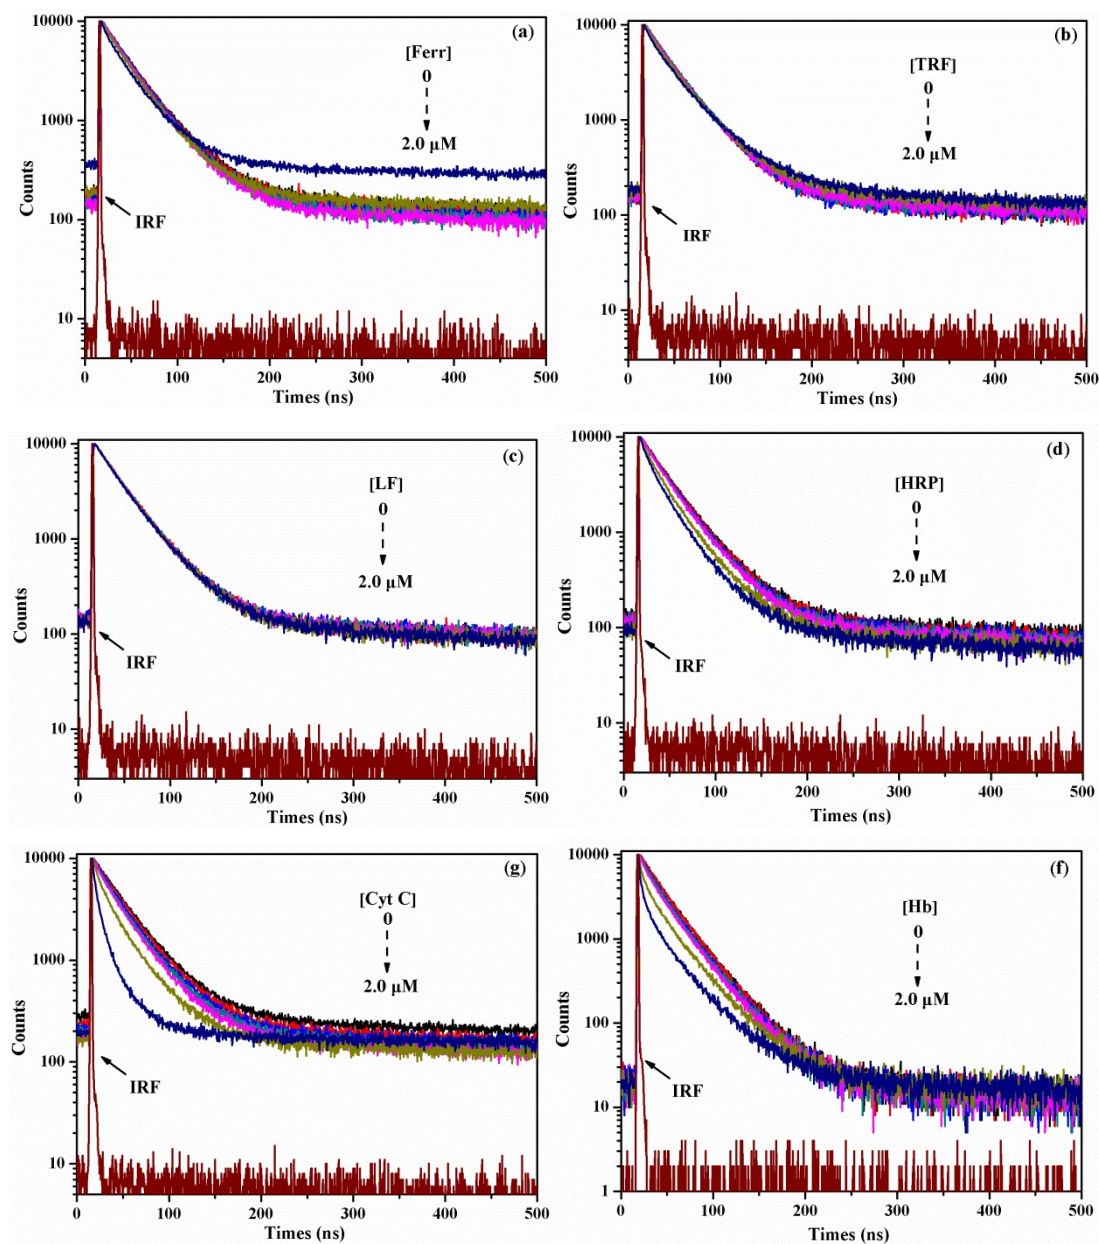

**Fig. S4** Time-resolved fluorescence decays of 1/SDBS (5  $\mu\text{M}$ /0.2 mM) upon titration of different metalloproteins: (a) Ferr, (b) TRF, (c) LF, (d) HRP, (e) Cyt C, and (f) Hb ( $\lambda_{\text{ex}} = 343.4 \text{ nm}$ ,  $\lambda_{\text{em}} = 498 \text{ nm}$ ).



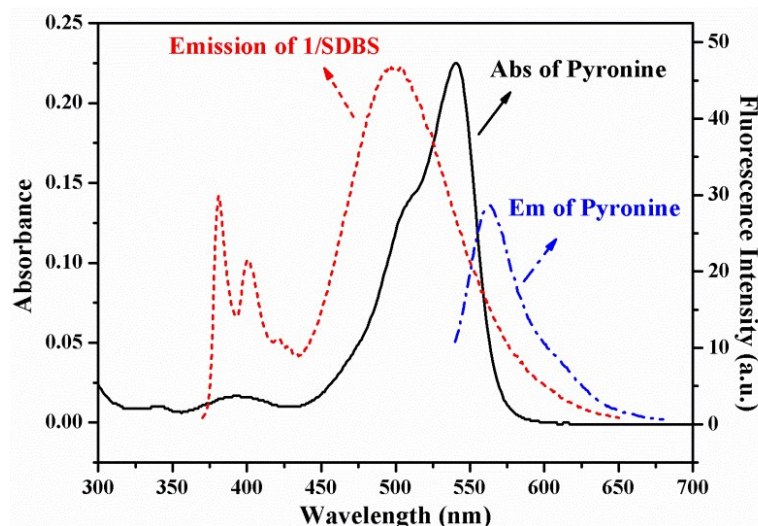

**Fig. S5** Fluorescence emission spectrum of 1/SDBS (5  $\mu\text{M}$ /0.2 mM) ( $\lambda_{\text{ex}} = 354 \text{ nm}$ ) and the absorbance and emission spectra of pyronine (5  $\mu\text{M}$ ,  $\lambda_{\text{ex}} = 540 \text{ nm}$ ).

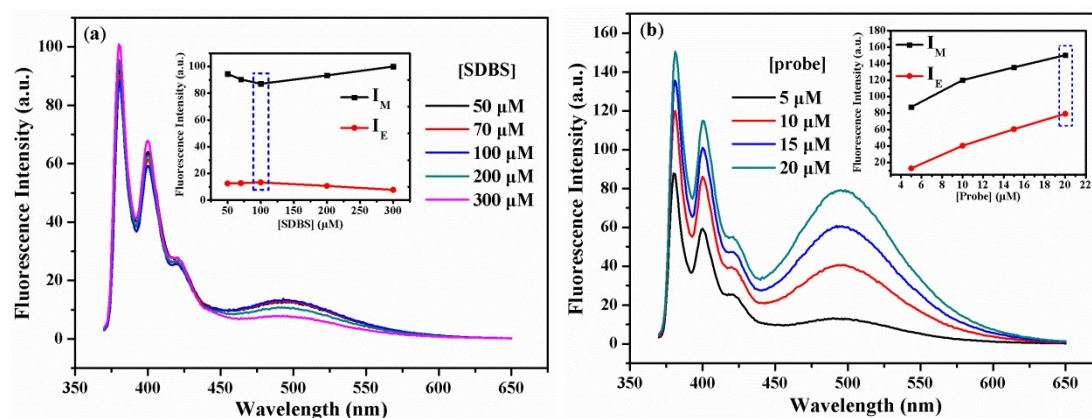

**Fig. S6** (a) Fluorescence emission spectra of **1** (5  $\mu\text{M}$ ) in a series of different concentrated SDBS solutions containing 1% human serum (10 mM HEPES, pH 7.4). Inset: Fluorescence intensity of monomer at 381 nm ( $I_M$ ) and excimer at 495 nm ( $I_E$ ) of **1** (5  $\mu\text{M}$ ) as a function of SDBS concentration in 1% human serum (10 mM HEPES, pH 7.4). (b) Fluorescence emission of **1** (5  $\mu\text{M}$ ) at different concentration in 0.1 mM SDBS aqueous solution containing 1% human serum (10 mM HEPES, pH 7.4). Inset: Fluorescence intensity of monomer at 381 nm ( $I_M$ ) and excimer at 495 nm ( $I_E$ ) of **1** (5  $\mu\text{M}$ ) in 0.1 mM SDBS solution containing 1% human serum (10 mM HEPES, pH 7.4).

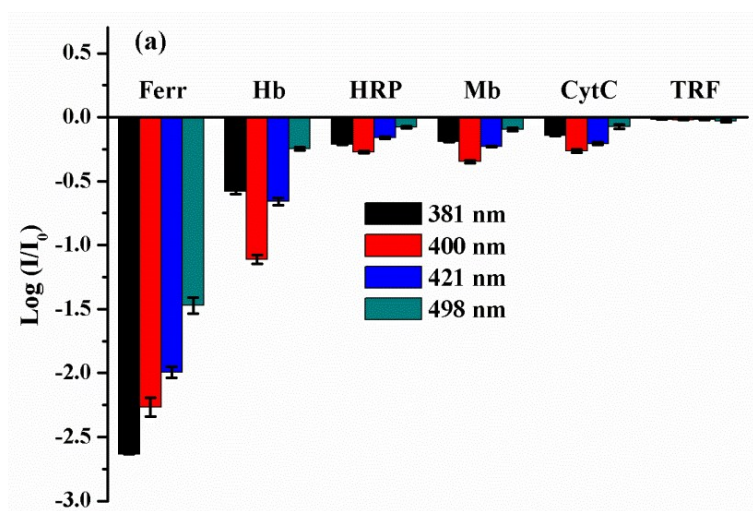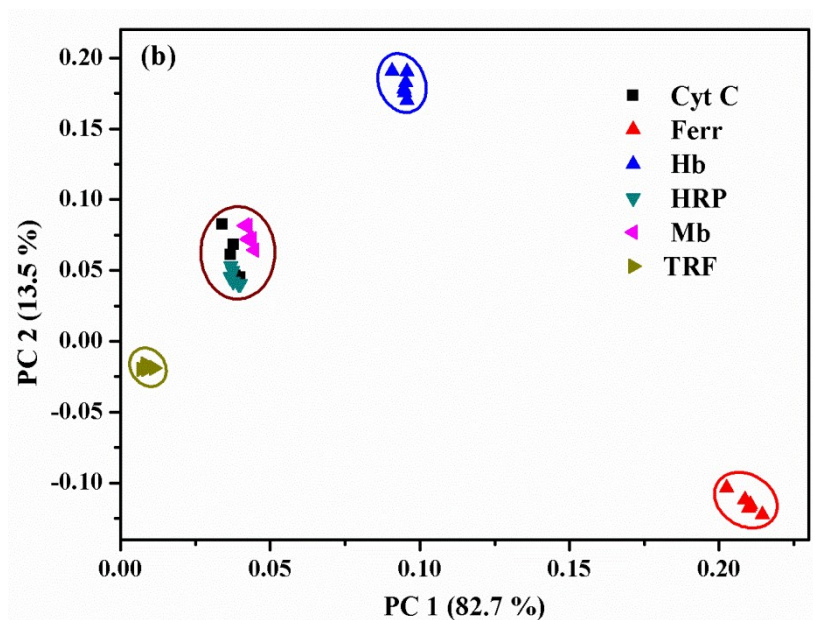

**Fig. S7** (a) Recognition patterns for metalloproteins (2 μM) by collecting fluorescence variation of 1/SDBS (20 μM/0.3 mM) at four selected wavelengths in 5.0% human serum (10 mM HEPES, pH 7.4). Each value is an average of three parallel measurements. (b) Two-dimensional PCA plots for the discrimination of 7 metalloproteins (2 μM) in 5.0% human serum (10 mM HEPES, pH 7.4).

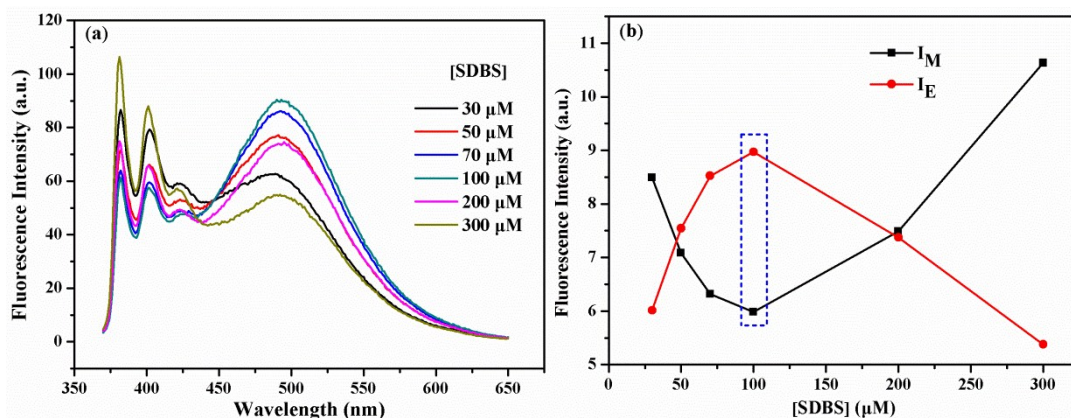

**Fig. S8** (a) Fluorescence emission spectra of **1** (5 μM) in a series of different concentrated SDBS solutions containing 10.0% human urine (10 mM HEPES, pH 7.4). (b) Fluorescence intensity of monomer at 381 nm ( $I_M$ ) and excimer at 498 nm ( $I_E$ ) of **1** (5 μM) as a function of SDBS concentration in 10.0% human urine (10 mM HEPES, pH 7.4).

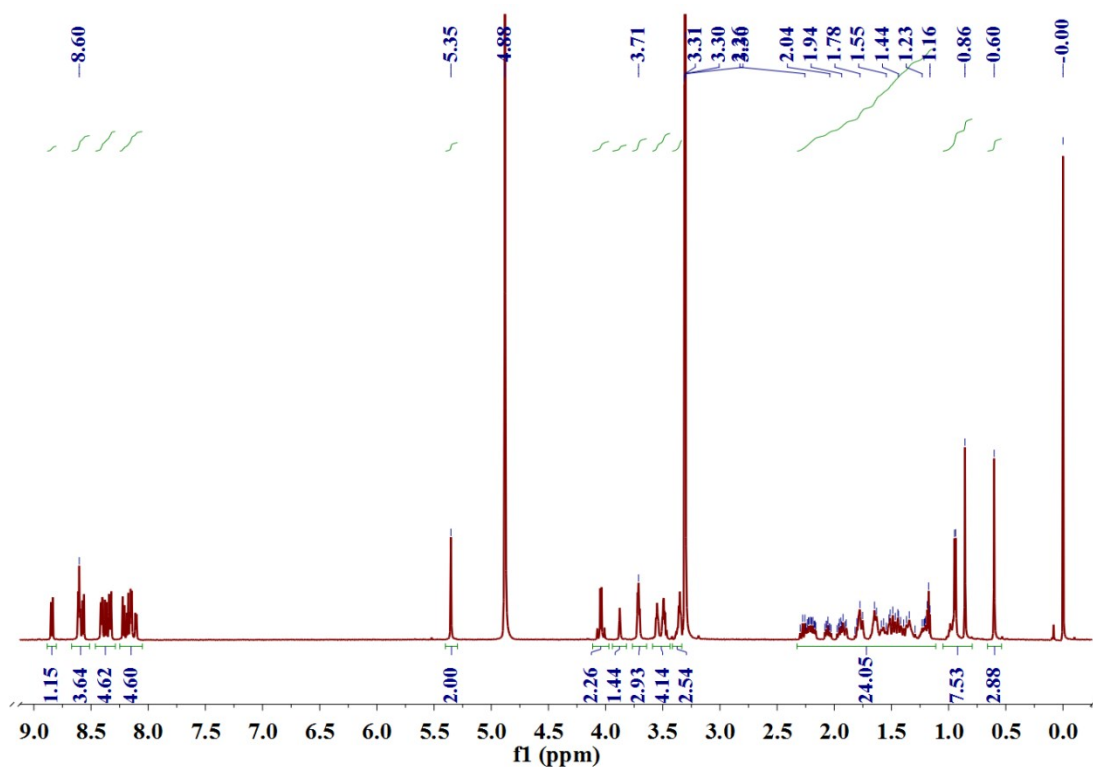

**Fig. S9** The  $^1\text{H}$  NMR spectrum of compound **1**

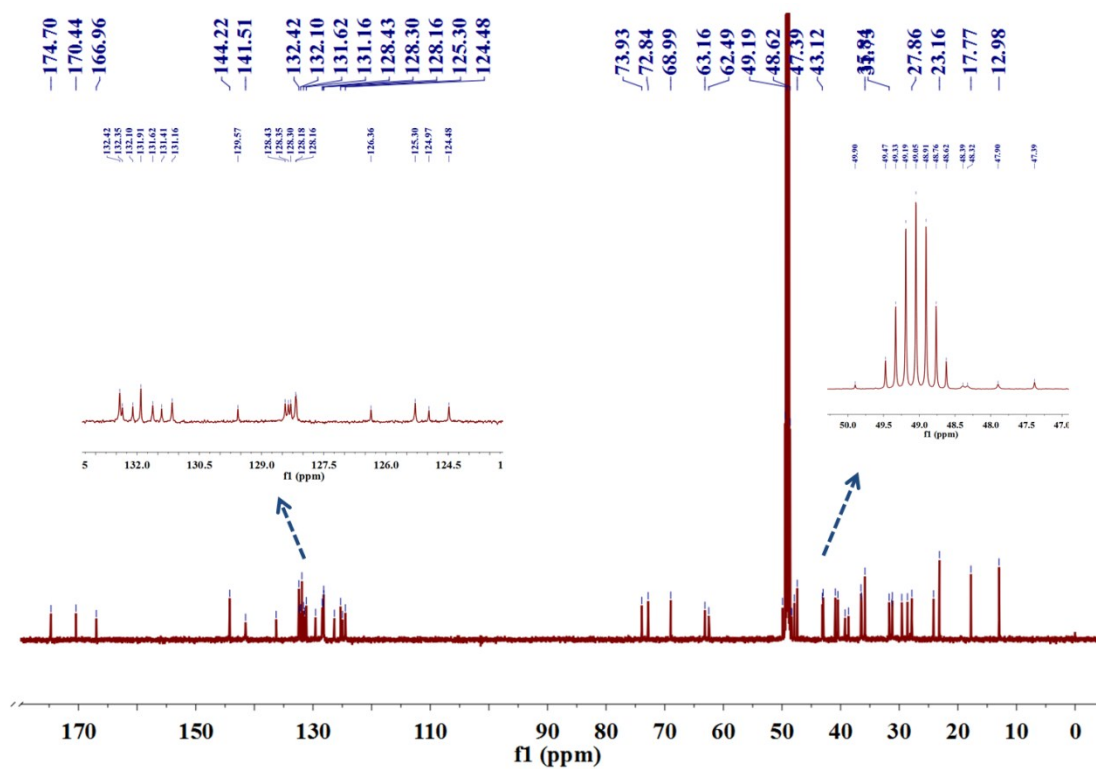

Fig. S10 The  $^{13}\text{C}$  NMR spectrum of compound 1

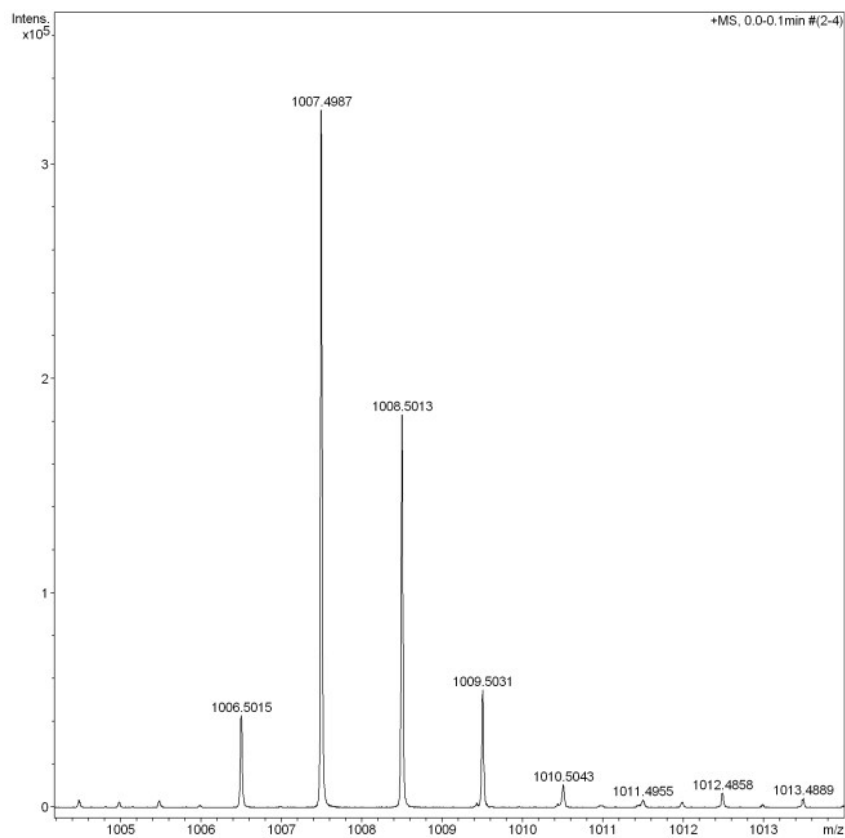

Fig. S11 The MS of compound 1
